# Supplementary material for: Catalytic synergy in palladium-enriched tungsten oxide nanogranules: redefining electrochromic dynamics and energy storage capabilities
Source: Royal Society of Chemistry journal article supplement (doi:10.1039/d5nr00207a), 2025-01-01
Supplement: d5nr00207a1.pdf [file d5nr00207a1.pdf]

## Supplementary Information

### Catalytic Synergy in Palladium-Enriched Tungsten Oxide Nanogranules: Redefining Electrochromic Dynamics and Energy Storage Capabilities

Pritam J. Morankar <sup>a</sup>, Rutuja U. Amate <sup>a</sup>, Aviraj M. Teli <sup>b</sup>, Iftikhar Hussain <sup>c</sup>, Sonali A. Bektalkar <sup>b</sup>, Chan-Wook Jeon <sup>a\*</sup>

<sup>a</sup> School of Chemical Engineering, Yeungnam University, 280 Daehak-ro, Gyeongsan 712-749, Republic of Korea.

<sup>b</sup> Division of Electronics and Electrical Engineering, Dongguk University-Seoul, 04620, Republic of Korea.

<sup>c</sup> Department of Mechanical Engineering, City University of Hong Kong, Hong Kong 999077, China.

\* Corresponding Authors' Email: [cwjeon@ynu.ac.kr](mailto:cwjeon@ynu.ac.kr)

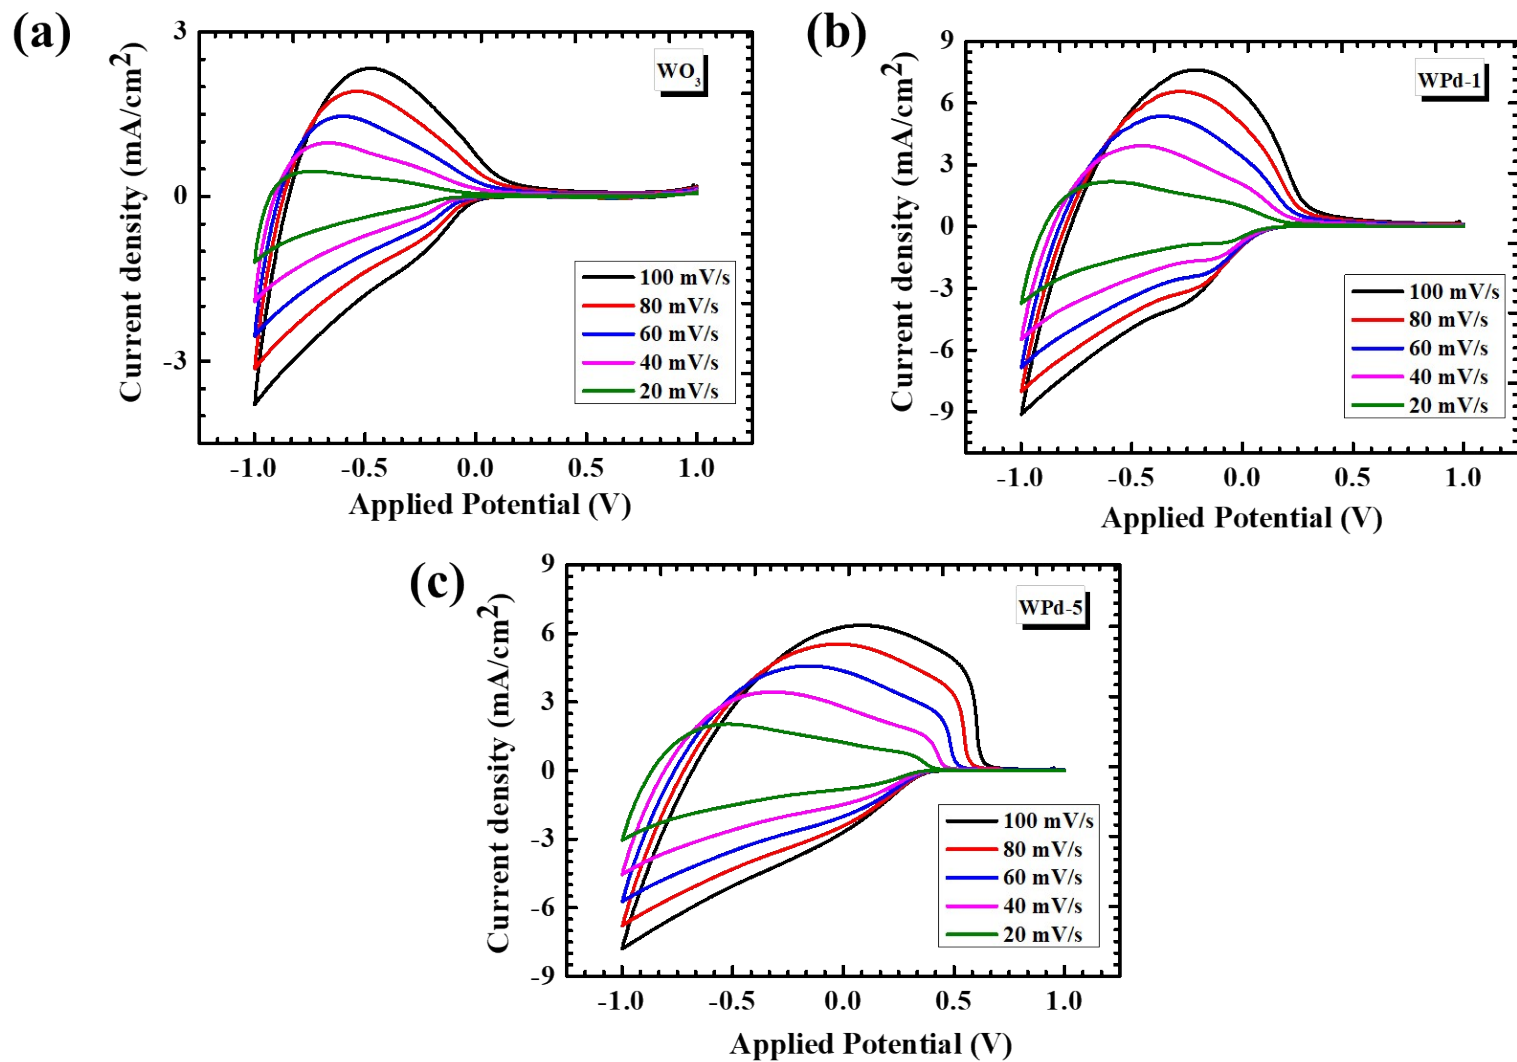

**Fig. S1** Cyclic voltammetry of (a) undoped WO<sub>3</sub> (b) WPd-1, and (c) WPd-5 samples at different scan rates (20-100 mV/s).

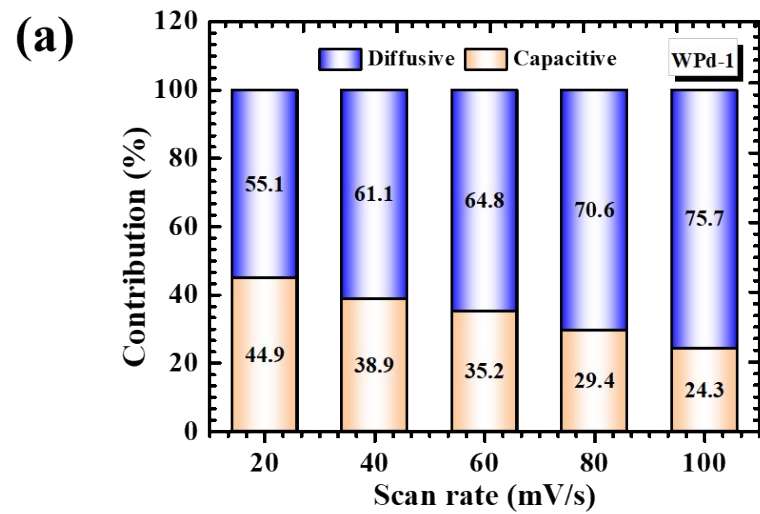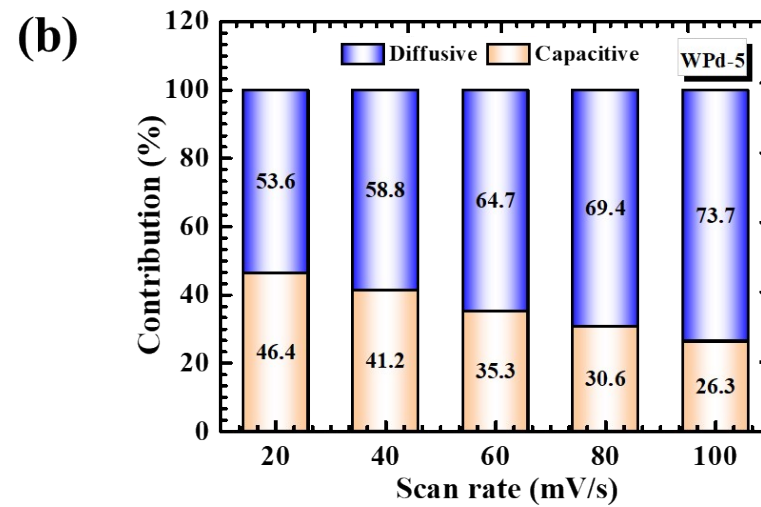

**Fig. S2** Graph of capacitive and diffusive-controlled contribution percentage of (a) WPd-1, and (b) WPd-5 samples.

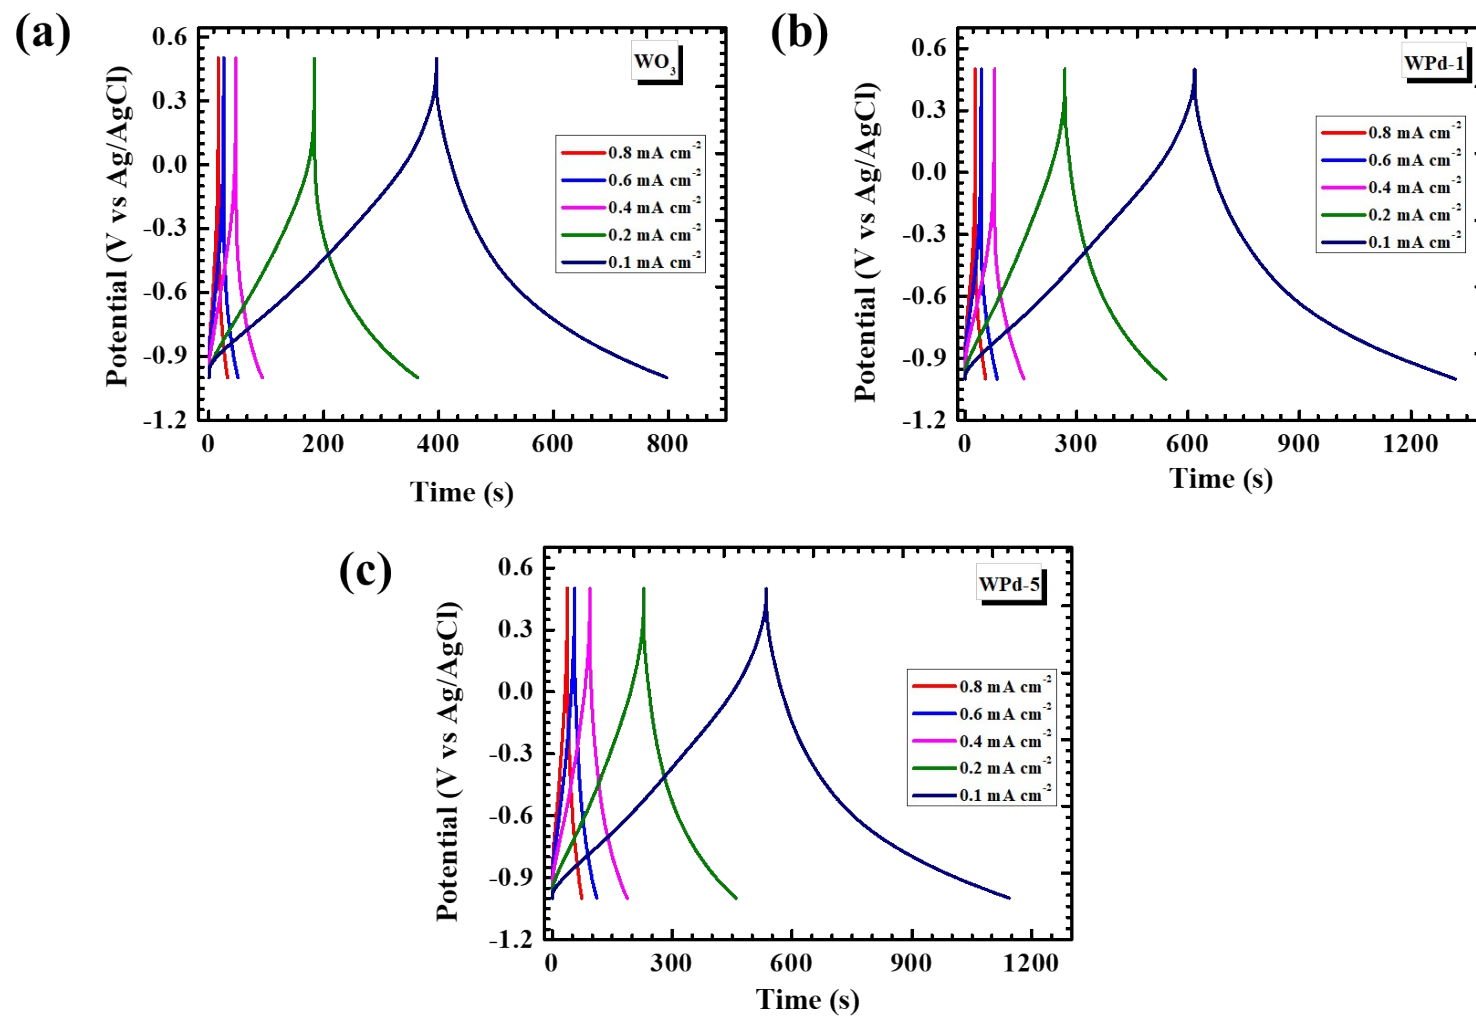

**Fig. S3** Galvanostatic charge-discharge curves of (a) undoped WO<sub>3</sub> (b) WPd-1, and (c) WPd-5 samples at variable current densities (0.1 – 0.8 mA cm<sup>-2</sup>).

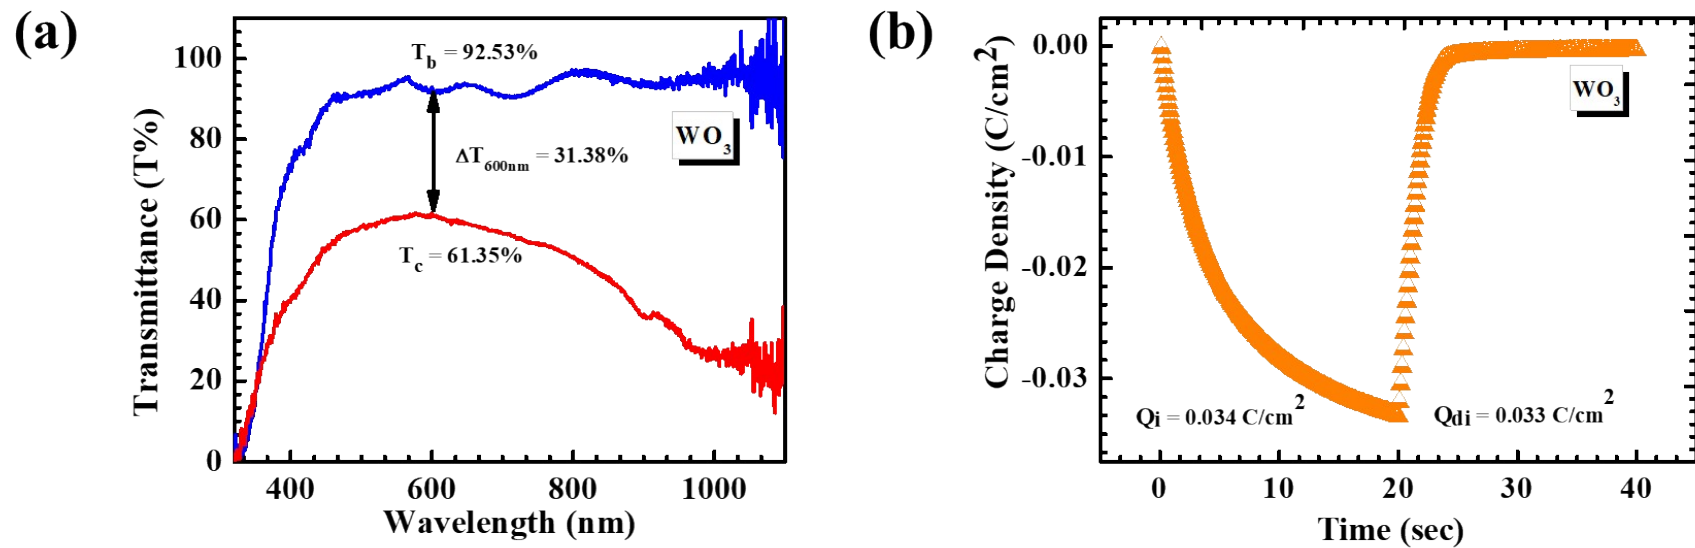

**Fig. S4** (a) Optical transmittance and spectrum of undoped  $\text{WO}_3$  thin film at the colored and bleached states from 300 to 1100 nm range over potential window  $\pm 1$  V and (b) CC trace of undoped  $\text{WO}_3$  thin film.

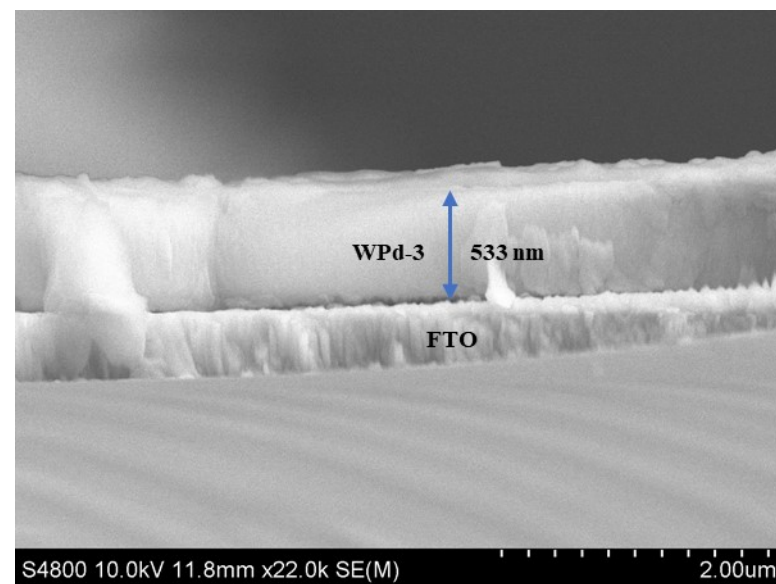

**Fig. S5** Cross-sectional image of the WPd-3 device thin film.
